# Supplementary material for: Fluorescence sensing of cyanide anions based on Au-modified upconversion nanoassemblies
Source: Royal Society of Chemistry journal article supplement (doi:10.1039/d0an01954b), 2021-01-01
Supplement: d0an01954b1.pdf [file d0an01954b1.pdf]

## Supplementary Information

### Fluorescence sensing of cyanide anions based on Au-modified upconversion nanoassemblies

Chunning Sun\* and Michael Gradzielski\*

Stranski-Laboratorium für Physikalische und Theoretische Chemie, Institut für Chemie, Technische  
Universität Berlin, Strasse des 17. Juni 124, 10623 Berlin, Germany

\*Corresponding authors:

E-mail: [sunchunning@gmail.com](mailto:sunchunning@gmail.com) (C. Sun), [michael.gradzielski@tu-berlin.de](mailto:michael.gradzielski@tu-berlin.de) (M. Gradzielski)

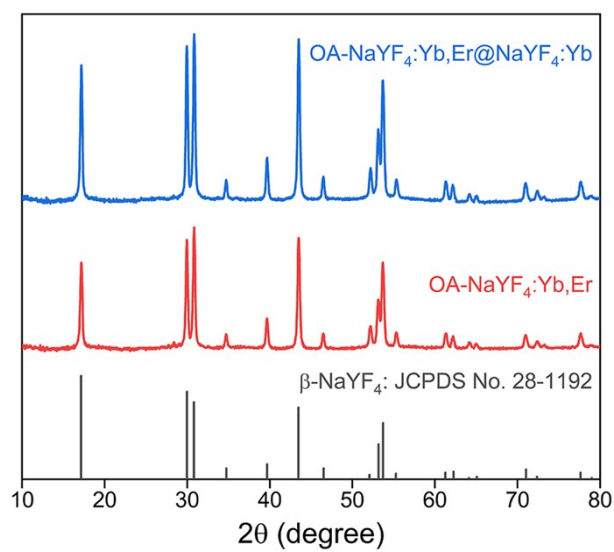

**Fig. S1** XRD patterns of OA-UCNPs, OA-csUCNPs, and the standard data of hexagonal  $\text{NaYF}_4$  (JCPDS No. 28-1192).

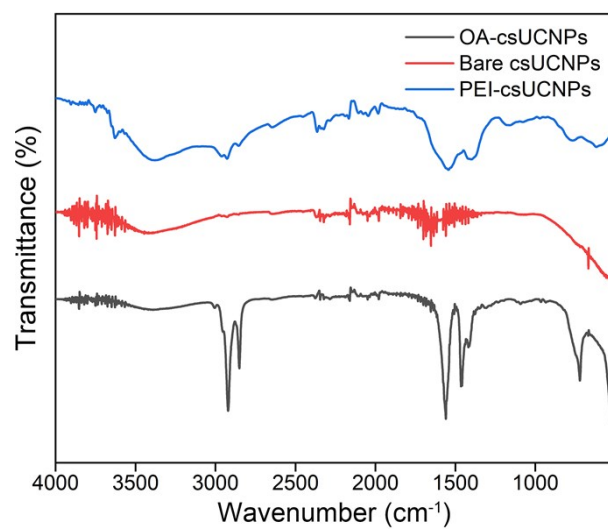

**Fig. S2** FT-IR spectra of OA-, ligand-free, and PEI-csUCNPs

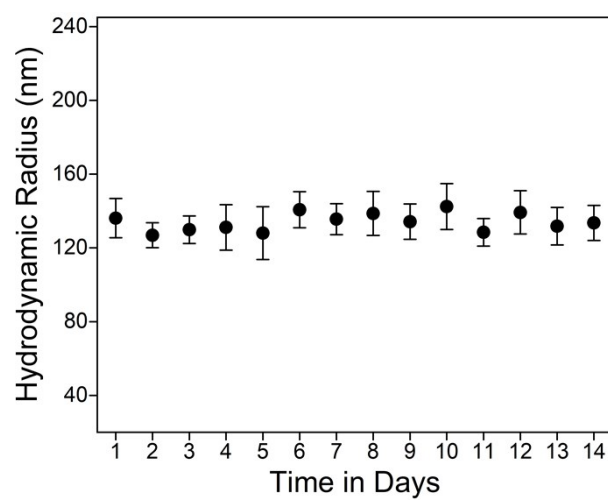

**Fig. S3** Hydrodynamic radius of 0.5 mg/mL csUCNPs/Au (0.1 mM Au NPs) nanocomposites with different aging times.

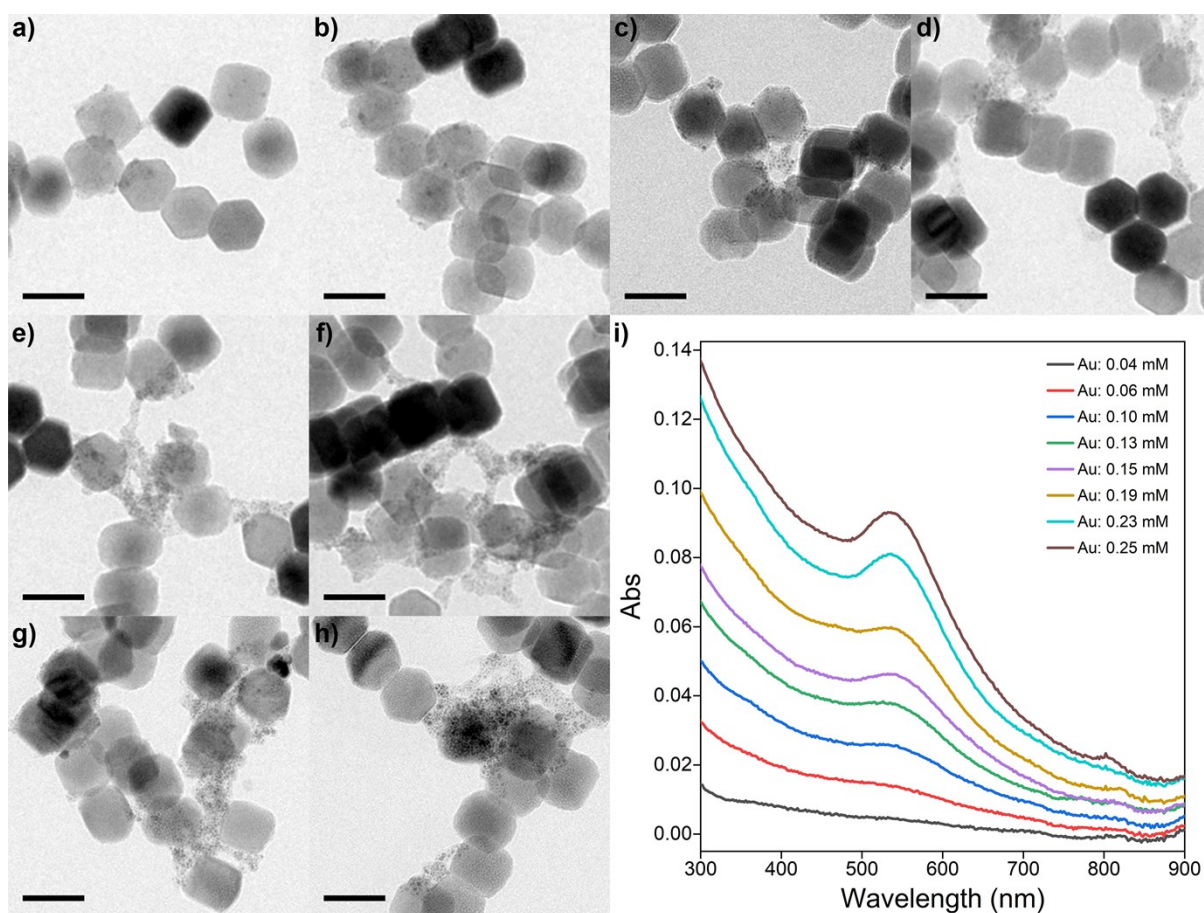

**Fig. S4** TEM images of 0.5 mg/mL csUCNPs/Au nanoassemblies with different contents of Au NPs. (a) 0.04 mM, (b) 0.06 mM, (c) 0.10 mM, (d) 0.13 mM, (e) 0.15 mM, (f) 0.19 mM, (g) 0.23 mM, (h) 0.25 mM. Scale bars: 50 nm. (i) UV-vis absorption spectra of 0.5 mg/mL csUCNPs/Au nanocomposites with different contents of Au NPs.
